# Supplementary material for: Quantifying Type-Specific Reproduction Numbers for Nosocomial Pathogens: Evidence for Heightened Transmission of an Asian Sequence Type 239 MRSA Clone
Source: PLOS journal article supplement (doi:10.1371/journal.pcbi.1002454), 2012-04-12
Supplement: S1 (10.1371/journal.pcbi.1002454.s001) [file journal.pcbi.1002454.s001]

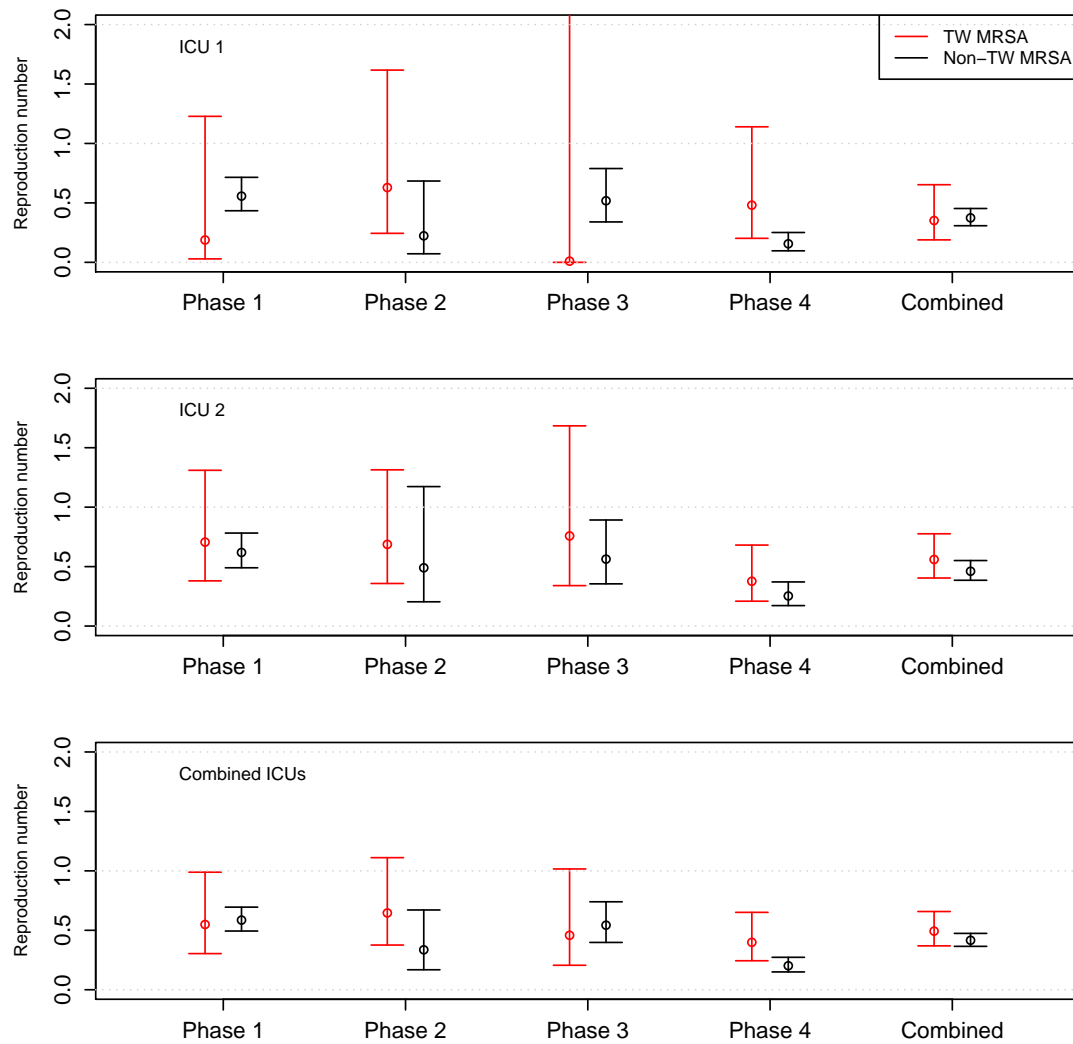

**Figure S1. Single admission reproduction numbers ( $R_a$ ) estimated using method 2.** Estimates (95% CIs) of the ward-level reproduction number,  $R_a$ , according to study phase, MRSA type and ward obtained using method 2 and assuming complete bacterial interference and no interaction between ICU 1 and ICU 2.
