# Supplementary material for: Quantifying Type-Specific Reproduction Numbers for Nosocomial Pathogens: Evidence for Heightened Transmission of an Asian Sequence Type 239 MRSA Clone
Source: PLOS journal article supplement (doi:10.1371/journal.pcbi.1002454), 2012-04-12
Supplement: S3 (10.1371/journal.pcbi.1002454.s003) [file journal.pcbi.1002454.s003]

**Table S1. TW and non-TW MRSA importation and acquisition events under different assumptions**

|          | ICU 1        |        |              |        | ICU 2        |        |              |        |
|----------|--------------|--------|--------------|--------|--------------|--------|--------------|--------|
|          | Importations |        | Acquisitions |        | Importations |        | Acquisitions |        |
|          | TW           | Non-TW | TW           | Non-TW | TW           | Non-TW | TW           | Non-TW |
| Baseline | 12           | 270    | 23           | 109    | 25           | 260    | 43           | 123    |
| SA1      | 11           | 268    | 24           | 111    | 24           | 256    | 44           | 127    |

The baseline assumption classifies all episodes where MRSA was recovered from an isolate taken within 48 hours of admission as importations. The SA1 assumption uses a 24 hour cutoff instead. See protocol in supporting material for full details of baseline and SA1 assumptions.
